# Supplementary material
Source: publisher site journal article supplement (https://www.dovepress.com/get_supplementary_file.php?f=508924.docx)
Supplement: Supplementary file 1 [file get_supplementary_file.php]

Supplement Table 1. Answers to the questions in the attitude dimension.

| Item | Strongly agree | Agree | Neutral | Disagree | Strongly disagree |
| --- | --- | --- | --- | --- | --- |
| A1. Airway pressure management is an important part of the perioperative management of patients undergoing surgery for severe craniocerebral trauma | 112 (56.00%) | 83 (41.50%) | 3 (1.50%) | 2 (1.00%) | 0 (0.00%) |
| A2. Improving cerebral perfusion and cerebral blood flow and controlling intracranial pressure are important for the perioperative management of patients undergoing surgery for severe craniocerebral trauma | 125 (62.50%) | 70 (35.00%) | 4 (2.00%) | 1 (0.50%) | 0 (0.00%) |
| A3. Airway pressure is correlated with intracranial pressure and cerebral perfusion pressure | 77 (38.50%) | 102 (51.00%) | 12 (6.00%) | 9 (4.50%) | 0 (0.00%) |
| A4. Neurologic function monitoring is important for the perioperative management of patients undergoing neurosurgery | 100 (50.00%) | 90 (45.00%) | 7 (3.50%) | 3 (1.50%) | 0 (0.00%) |
| A5. I am confident of providing the correct perioperative management for patients undergoing surgery for severe craniocerebral trauma | 34 (17.00%) | 104 (52.00%) | 60 (30.00%) | 2 (1.00%) | 0 (0.00%) |
| A6. It is important that I regularly update my knowledge of the perioperative management of craniocerebral trauma | 125 (62.50%) | 69 (34.50%) | 4 (2.00%) | 2 (1.00%) | 0 (0.00%) |

Supplement Table 2. Correlation analysis

|  | Knowledge | Attitude | Practice |
| --- | --- | --- | --- |
| Knowledge | 1 |  |  |
| Attitude | 0.522 (*P* < 0.001) | 1 |  |
| Practice | 0.073 (*P* = 0.307) | 0.059 (*P* = 0.403) | 1 |

**Supplement Table S3.** Summary of the items that would necessitate additional training.

| K13. Hyperventilation is not recommended in any patient with craniocerebral trauma. |
| --- |
| K17. What is the GCS score for a patient with craniocerebral trauma who opens their eyes to pain, has slurred and unclear speech, and hyperextension of the limbs? |
| K18. What are the general goals of airway management? |
| K19. What is the intracranial pressure of a healthy adult in the supine position? |
| K20. What is the CPP in a patient with a MAP of 120 mmHg and an ICP of 80 mmHg? |
| K21. What are the goals for CPP management? |
| A5. I am confident of providing the correct perioperative management for patients undergoing surgery for severe craniocerebral trauma. |
